# Supplementary material
Source: PubMed Central journal article supplement (PMC2753380)
Supplement: NIHMS105985-supplement-01.pdf [file NIHMS105985-supplement-01.pdf]

1  
2  
3 Mukamel ar-2008-00258z.R1 edited and approved  
4  
5  
6  
7  
8

9 Over the past 15 years, researchers have extended the multidimensional approach (originated  
10 with NMR in the 1970s) to infrared and visible coherent spectroscopy. These advances have  
11 dramatically enhanced the temporal resolution of coherent spectroscopy from the microsecond to  
12 the femtosecond regime.  
13  
14  
15

16  
17  
18 NMR spectroscopists have developed principles for the design of pulse sequences that enhance  
19 selected spectral features and reveal desired dynamical events. Extending these principles to the  
20 optical regime offers numerous opportunities for narrowing the line shapes in specific directions,  
21 unraveling weak cross-peaks from otherwise congested spectra, and controlling the interferences  
22 between quantum pathways. We can achieve these enhancements by shaping the spectral and  
23 temporal profiles of the pulses. Pulse polarization shaping may lead to unique probes of time-  
24 dependent chirality.  
25  
26  
27  
28  
29  
30  
31  
32  
33

34 In this Account, we compare two types of signals. The first, the photon echo, is generated in the  
35 direction  $-k_1+k_2+k_3$ , and the second, double quantum coherence, is detected at  $+k_1+k_2-k_3$ . Here  
36  $k_1$ ,  $k_2$  and  $k_3$  are the wave vectors of the three incoming pulses in chronological order. We  
37 illustrate the novel information extracted from these signals by simulations of three physical  
38 systems. In the first system, spectra of GaAs semiconductor quantum wells provide a direct look  
39 at many-body electron correlation effects. We directly observe these projections of the many-  
40 electron wavefunction, which we can use to test the quality of various levels of computational  
41 techniques for electronic structure. Secondly, the spectra of photosynthetic aggregates reveal  
42 couplings between chromophores, quantum coherence signatures of chromophore entanglement,  
43 and energy-transfer pathways. Using some fundamental symmetries of pulse polarization  
44 configurations of nonlinear signals, we can construct specific superpositions of signals that can  
45 better distinguish between various coherent and incoherent exciton transport pathways and  
46 amplify subtle variations between different species of the Fenna-Mathews-Olson (FMO)  
47  
48  
49  
50  
51  
52  
53  
54  
55  
56  
57  
58  
59  
60

1  
2  
3 antenna complex. Both of the first two applications require femtosecond pulses of light in the  
4 visible range. The third application demonstrates how resonant x-ray pulses may be used to  
5 generate core excitations that are highly localized at selected atoms. Such signals can monitor the  
6 motions of valence electron wavepackets in real space with atomic spatial resolution  
7  
8  
9  
10

11  
12  
13  
14  
15 These future x-ray applications will require attosecond bright x-ray sources which are currently  
16 being developed in several labs. Common principles underlie these techniques in coherent  
17 spectroscopy for spins, valence electrons, and core electronic excitations, spanning frequencies  
18 from radiowaves to hard x-rays.  
19  
20  
21  
22  
23  
24  
25  
26  
27  
28  
29  
30  
31  
32  
33  
34  
35  
36  
37  
38  
39  
40  
41  
42  
43  
44  
45  
46  
47  
48  
49  
50  
51  
52  
53  
54  
55  
56  
57  
58  
59  
60
